# Supplementary material
Source: PubMed Central journal article supplement (PMC3302510)
Supplement: supp_86.7.3513_FigS1_TableS1.pdf [file supp_86.7.3513_FigS1_TableS1.pdf]

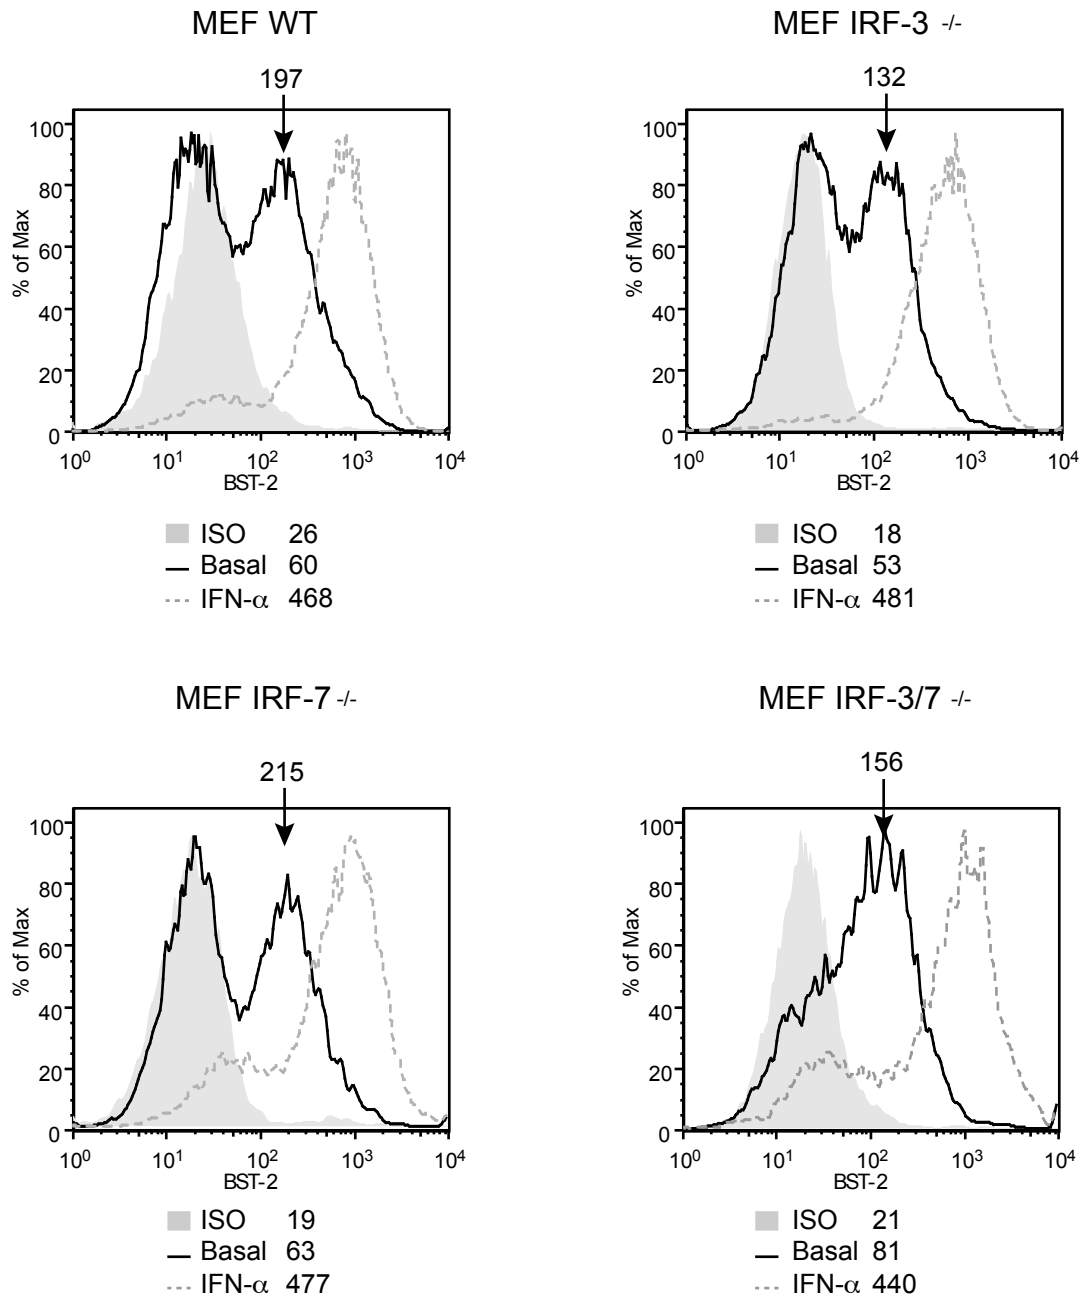

**Fig. S1: Cell-surface BST-2 up-regulation by type-I IFN in primary MEF cultures.** BST-2 cell-surface expression in very early passage of primary cultures of MEF WT, MEF IRF-3<sup>-/-</sup>, MEF IRF-7<sup>-/-</sup> or MEF IRF-3/7<sup>-/-</sup> prior or after treatment with mouse IFN- $\alpha$ . A representative histogram of 2 independent experiments is shown. Each arrow indicates MFI value for basal positive peak. Data was analyzed and plotted as described in figure 8. ISO, isotype control.

**Table S1: List of primers used in this study**

| Primer name                                              | Sequence (5' to 3')                                            |
|----------------------------------------------------------|----------------------------------------------------------------|
| <i>BST2</i> Wild type full length and deletion reporters |                                                                |
| -1409F_KpnI                                              | CCG <b>ggtacc</b> AGTTAGCAGGCCAGAACAGT                         |
| +50R_Hind                                                | GG <b>Gaagctt</b> ACGAAGTAGATGCCATCCAG                         |
| -1063F_KpnI                                              | CCG <b>ggtacc</b> ACCATGCCTGGCTCTAAGTG                         |
| -961F_KpnI                                               | CCG <b>ggtacc</b> GACTTGACCTCGCCTACTGT                         |
| -884F_KpnI                                               | CCG <b>ggtacc</b> CTGTGGTCAGGATGTGG                            |
| -691F_KpnI                                               | CCG <b>ggtacc</b> TTACCTGGTATCCTGGAGTC                         |
| -405F_KpnI                                               | CCG <b>ggtacc</b> CCTCACTCCACCACGCAACT                         |
| -280F_KpnI                                               | CCG <b>ggtacc</b> GTAACACACAGCAGAGGCACAGG                      |
| -182F_KpnI                                               | CCG <b>ggtacc</b> AGGGTGAAAAAAAAGCC                            |
| -135F_KpnI                                               | CCG <b>ggtacc</b> ACCTAATTAATCCTCTGCCTG                        |
| -123F_KpnI                                               | CCG <b>ggtacc</b> CTCTGCCTGTAGGTGCCTCA                         |
| -165R_Hind                                               | GG <b>Gaagctt</b> GCTTTTTTTTCACCCTGC                           |
| <i>BST2</i> Mutation reporters                           |                                                                |
| M2F                                                      | GCCGATAATGGGCCTGATTTAAGGTAGGAAG<br>CCCTGGCTCT                  |
| M2R                                                      | AGAGCCAGGGCTTCCTACCTTAAATCAGGCC<br>CATTATCGGC                  |
| M5F                                                      | GGTGAAAAAAAAGCCCACCTCCTTTCTCTTAA<br>ACTGAAACTGAAAACCTAATTAATC  |
| M5R                                                      | GATTAATTAGGTTTTTCAGTTTCAGTTTAAGAGA<br>AAGGAGGTGGGCTTTTTTTTCACC |
| M6F                                                      | AAAAGCCCACCTCCTTTCTGGGACCCTGACC<br>CTGAAAACCTAATTAATCCTCTGC    |
| M6R                                                      | GCAGAGGATTAATTAGGTTTTTCAGGGTCAGG<br>GTCCCAGAAAGGAGGTGGGCTTTT   |
| M7F                                                      | TGAAAAAAAAGCCCACCTCCTTTCTAAGAAAC<br>TGAAACTGAAAACCTAATTA       |
| M7R                                                      | TAATTAGGTTTTTCAGTTTCAGTTTCTTAGAAAG<br>GAGGTGGGCTTTTTTTTCA      |
| M8F                                                      | CCTTTCTGGGAAACTGAAACTCCAAACCTAAT<br>TAATCCTCTGCC               |
| M8R                                                      | GGCAGAGGATTAATTAGGTTTGGAGTTTCAGT<br>TTCCCAGAAAGG               |
| M9F                                                      | GTGAAAAAAAAGCCCACCTCCTAACTGGGAA<br>ACTGAAACTGAAAAC             |
| M9R                                                      | GTTTTTCAGTTTCAGTTTCCCAGTTAGGAGGTG<br>GGCTTTTTTTTTCAC           |
